# Supplementary material for: The role of zinc sulfate in enhancing cellular and humoral immune responses to foot-and-mouth disease vaccine
Source: PubMed Central journal article supplement — Virus Res. 2023 Aug 9;335:199189. doi: 10.1016/j.virusres.2023.199189 (PMC10432855; doi:10.1016/j.virusres.2023.199189), 2023-08-09
Supplement: mmc1.pdf [file mmc1.pdf]

**Supplementary Tables and Figure for**

**The role of zinc sulfate in enhancing cellular and humoral immune responses to foot-and-mouth disease vaccine**

Mi-Kyeong Ko, Hyeong Won Kim, So Hui Park, Jong-Hyeon Park, Su-Mi Kim, Min Ja Lee

**Supplementary Table 1.** List of primer sequences for qRT-PCR

| Target | Forward/Reverse | Sequence (5'- 3')      | Length (mer) |
|--------|-----------------|------------------------|--------------|
| RIG-I  | RIG-I F         | GCACCTCATACTTACAGCCCA  | 21           |
|        | RIG-I R         | CCACAACCAGTAGGAGCACAT  | 21           |
| TLR4   | TLR4 F          | GCAATAGCTTCTCCAGCTTTCC | 22           |
|        | TLR4 R          | CAGATACCCCTTGTGTGCGA   | 20           |
| MyD88  | MyD88 F         | CCATTCGAGATGACCCCCTG   | 20           |
|        | MyD88 R         | TGCACAAACTGGGTATCGCT   | 20           |
| TRAF6  | TRAF6 F         | TCGCAGTAGCTCCTGTACCT   | 20           |
|        | TRAF6 R         | AGCTCCCGGATTTGATGGTC   | 20           |
| NF-κB  | NFκB F          | TCGCTGCCAAAGAAGGACAT   | 20           |
|        | NFκB R          | AGCGTTCAGACCTTCACCGT   | 20           |
| CARD9  | CARD9 F         | CCGCAGCTCTACAAGAAGGT   | 20           |
|        | CARD9 R         | TCTGCAGCTTCATCACCTCG   | 20           |
| STAT1  | STAT1 F         | TGCACGATGGTCTCAGCTTT   | 20           |
|        | STAT1 R         | CAGCAGTGGGACCAAGAAGT   | 20           |
| CD80   | CD80 F          | TCAGACACCCAGGTACACCA   | 20           |
|        | CD80 R          | GACACATGGCTTCTGCTTGA   | 20           |
| CD86   | CD86 F          | TTTGGCAGGACCAGGATAAC   | 20           |
|        | CD86 R          | GCCCTTGTCCTTGATTTGAA   | 20           |
| CD28   | CD28 F          | TCAAAGGAGTTCCGGGCATC   | 20           |
|        | CD28 R          | CTGAAGCAGGCGGAGTAAT    | 20           |
| CD19   | CD19 F          | GGACGACAGACTTCCTGAGC   | 20           |
|        | CD19 R          | GTTCTGGCCCATCAGGATTA   | 20           |
| CD21   | CD21 F          | TGCCATGCCTACAAAGCTGA   | 20           |
|        | CD21 R          | GTAGTAACCAGGGCGGCATT   | 20           |

7 **Supplementary Table 1 (continued).**

| <b>Target</b> | <b>Forward/Reverse</b> | <b>Sequence (5'- 3')</b> | <b>Length (mer)</b> |
|---------------|------------------------|--------------------------|---------------------|
| CD81          | CD81 F                 | TCAACAAGGACCAGATCGCC     | 20                  |
|               | CD81 R                 | GAGCGTCTCGTGGAAAGTCT     | 20                  |
| IFN $\alpha$  | IFN $\alpha$ F         | CATCTGCTCTCTGGGCTGTG     | 20                  |
|               | IFN $\alpha$ R         | TGAGGGGATCCAAAGTCCCT     | 20                  |
| IFN $\beta$   | IFN $\beta$ F          | TGCAACCACCACAATTCCAGA    | 21                  |
|               | IFN $\beta$ R          | GGTTTCATTCCAGCCAGTGC     | 20                  |
| IFN $\gamma$  | IFN $\gamma$ F         | GCCATTCAAAGGAGCATGGAT    | 21                  |
|               | IFN $\gamma$ R         | CTGATGGCTTTGCGCTGGAT     | 20                  |
| IL-1 $\beta$  | IL-1 $\beta$ F         | AGCCAGTCTTCATTGTTTCAGGT  | 22                  |
|               | IL-1 $\beta$ R         | TCATCTCTTTGGGGCCATCAG    | 21                  |
| IL-6          | IL-6 F                 | CTGCAGTCACAGAACGAGTG     | 20                  |
|               | IL-6 R                 | CGGCATCAATCTCAGGTGCC     | 20                  |
| IL-12p40      | IL-12p40 F             | GGAGTATAAGAAGTACAGAGTGG  | 23                  |
|               | IL-12p40 R             | GATGTCCCTGATGAAGAAGC     | 20                  |
| IL-23p19      | IL-23p19 F             | CCATATCCAGTGCGGGGATG     | 20                  |
|               | IL-23p19 R             | AGGCCTTGGTGGATCCTTTG     | 20                  |
| IL-23R        | IL-23R F               | TCCCTCATTGCAAAGCACAA     | 20                  |
|               | IL-23R R               | GCATCTCCTCTTGCAAGCAAAT   | 22                  |
| IL-17A        | IL-17A F               | CTCGTGAAGGCGGGAATCAT     | 20                  |
|               | IL-17A R               | GGTGTGCTCCGGTTCAAGAT     | 20                  |
| HPRT          | HPRT F                 | CCCAGCGTCGTGATTAGTGA     | 20                  |
|               | HPRT R                 | GCCGTTCAAGTCTGTCCATA     | 20                  |

9 **Supplementary Fig. 1.** Cellular cytotoxicity response of FMDV cell lines in zinc sulfate. Data  
10 express the percentage of cell viability of exposure to BHK-21 (A); LFBK (B); and ZZ-R 127  
11 (C). (\* $p < 0.05$ , \*\* $p < 0.01$ , \*\*\* $p < 0.001$ , and \*\*\*\* $p < 0.0001$ ).

12

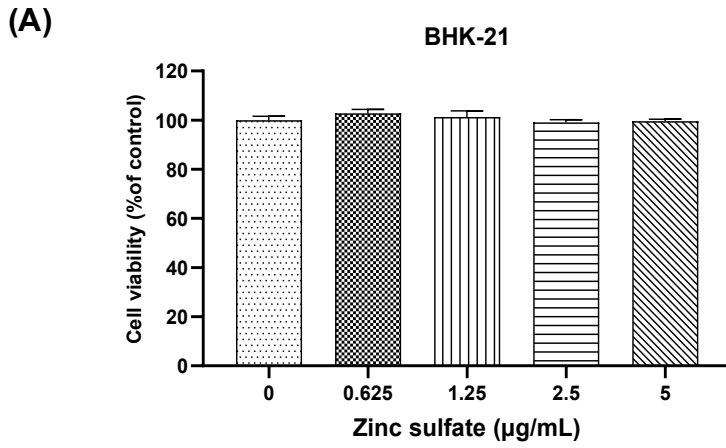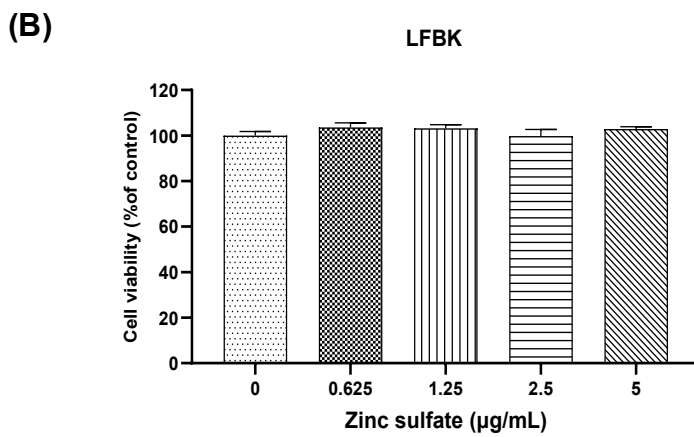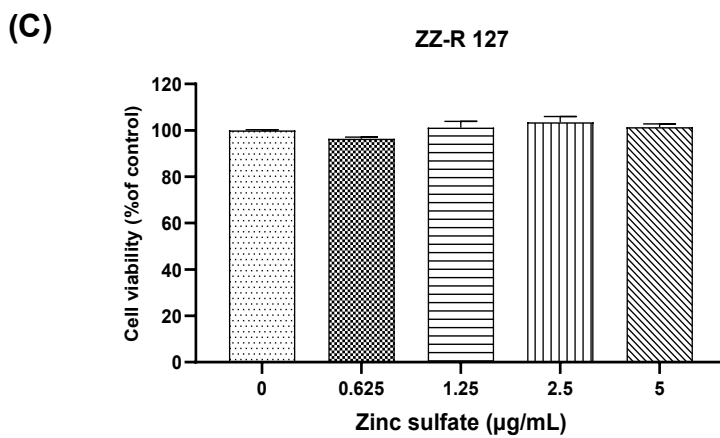

13
